# Supplementary material
Source: Springer Nature journal article supplement (https://www.springermedizin.de/resource/supplementary/13048_2014_240_MOESM1_ESM.pdf/9665188)

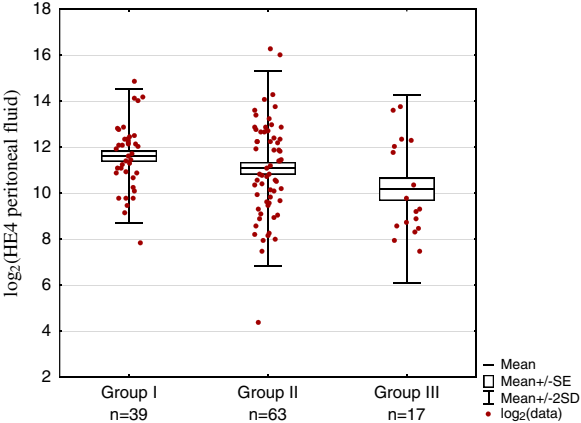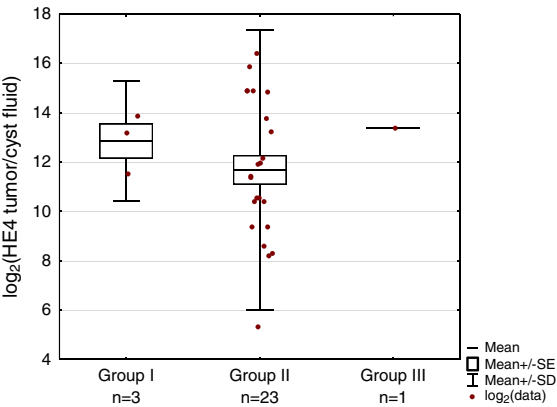

Supplement: MOESM1 [file 9665188]
